# Supplementary material for: Diverse roles of TssA‐like proteins in the assembly of bacterial type VI secretion systems
Source: EMBO J. 2019 Aug 12;38(18):e100825. doi: 10.15252/embj.2018100825 (PMC6745524; doi:10.15252/embj.2018100825)
Supplement: Supplementary file 1 — Appendix [file EMBJ-38-e100825-s001.pdf]

**Table of contents**

Appendix Figure S1. Photobleaching of cytosolic TssA during sheath polymerization

Appendix Figure S2. Cryo-EM of TssA<sub>VC</sub>

Appendix Figure S3. TssA<sub>VC</sub> purification

Appendix Figure S4. TssA<sub>VC</sub> and TagA<sub>VC</sub> protein interaction assays

Appendix Table S1. TssA proteins pairwise identity (%)

Appendix Table S2. Strains used in this study

Appendix Table S3. Summary of Co-IP and subsequent MS analysis

Appendix Table S4. EM Data collection and processing

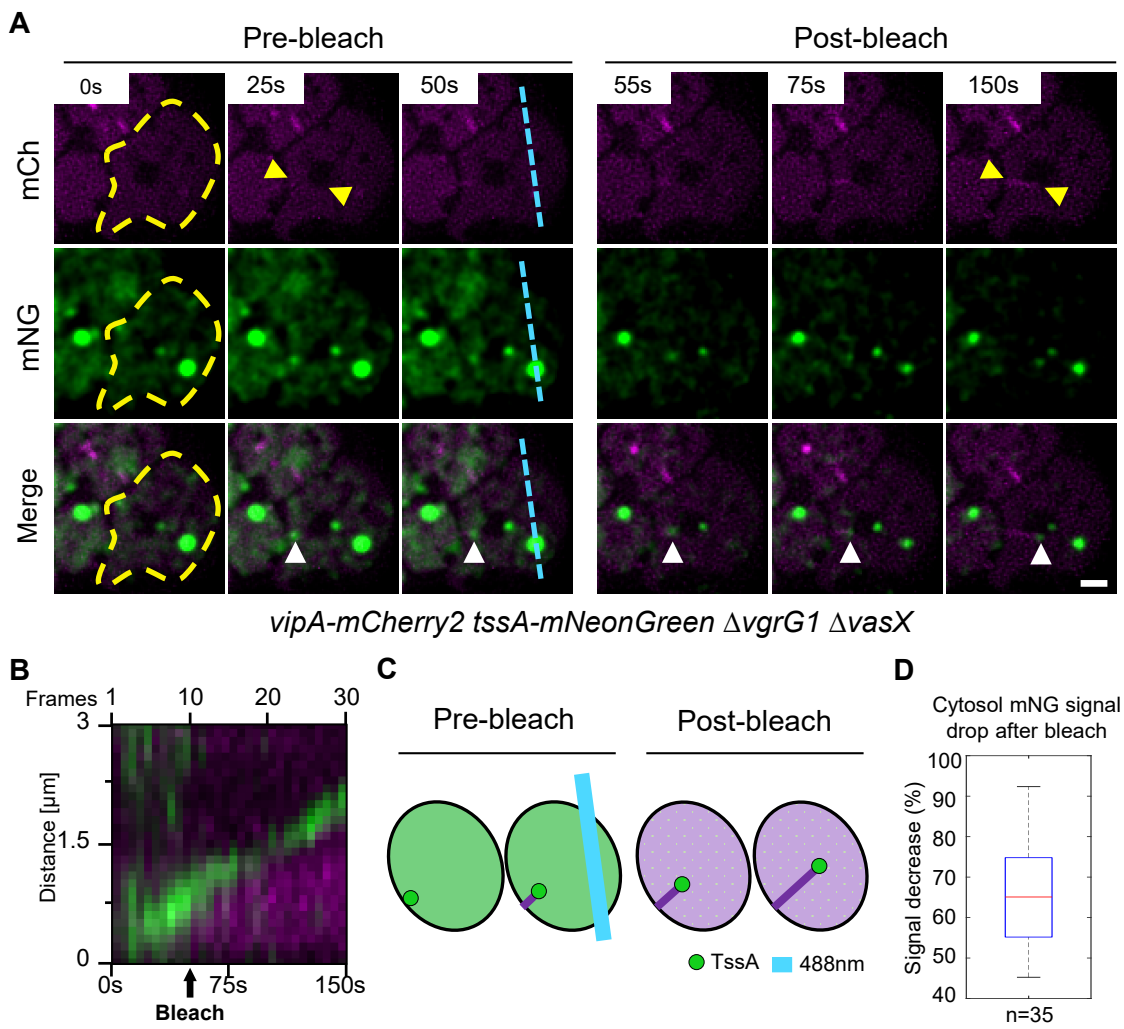

### Appendix Figure S1. Photobleaching of cytosolic TssA during sheath polymerization

A. Photobleaching of cytosol (blue dotted line) reveals stable TssA<sub>VC</sub>-mNeonGreen complex (white arrow) at the leading edge of the polymerizing sheath (yellow arrows). Spheroplast induction in liquid culture was achieved by addition of 500μg/ml Ampicillin. Yellow dotted line corresponds to cell outline, scale bar is 2μm.

B. Kymograph of (a), yellow arrows.

C. Scheme of bleaching experiment.

D. Quantification of cytosolic mNeonGreen signal decrease after photobleaching with 488 nm laser. Data information section. In boxplots shown here, the central mark of each box indicates the median and the bottom and top edges of the box indicate the 25th and 75th percentiles, respectively. The whiskers extend to the most extreme data points not considered outliers, and the outliers are plotted individually using the '+' symbol labeled in red.

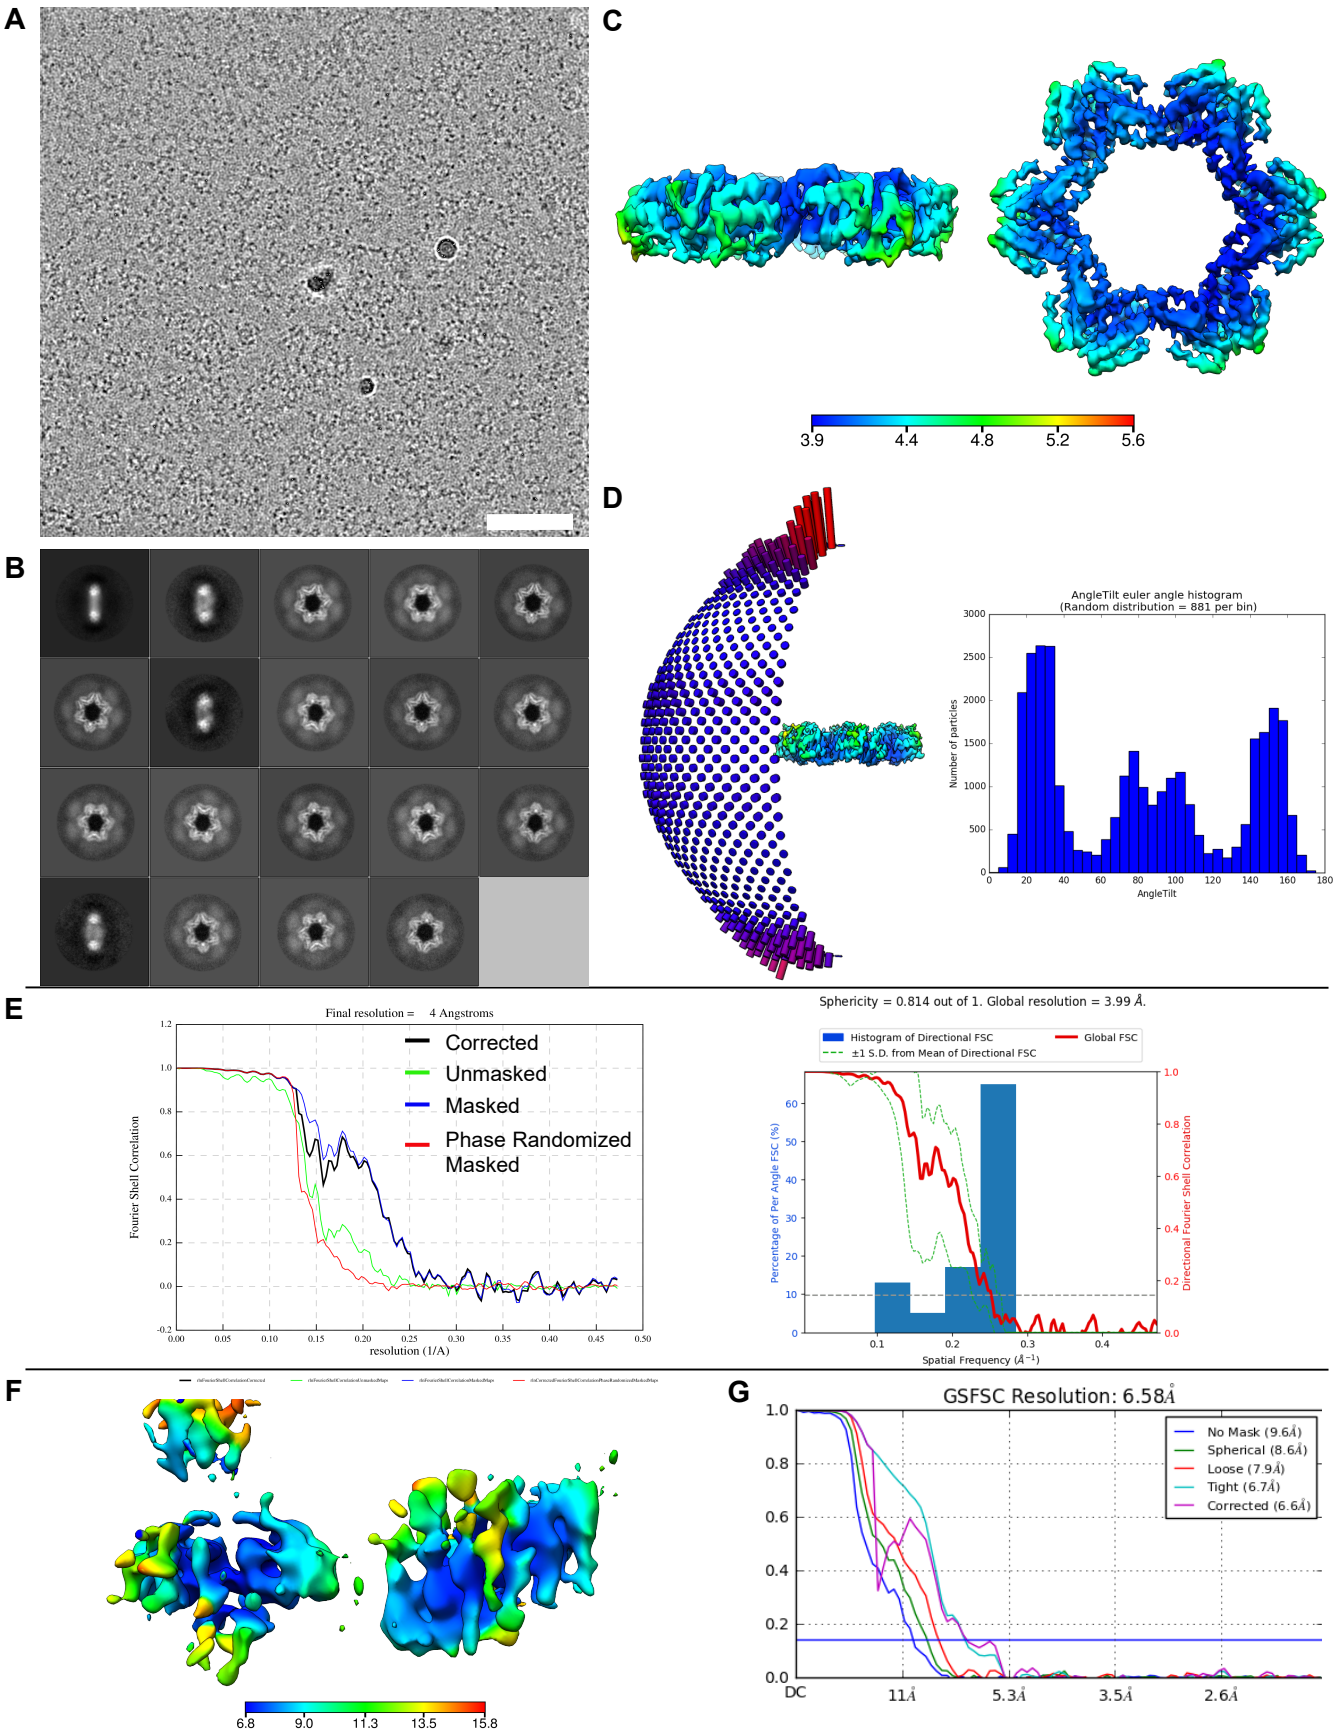

**Appendix Figure S2. Cryo-EM of TssA<sub>VC</sub>**

- A. Cryo-EM image (drift-corrected, dose-weighted and low-pass filtered to 20 Å) of TssA<sub>VC</sub> sample (scale bar: 50 nm).
- B. Representative 2D class averages of TssA<sub>VC</sub> particles sorted by the number of particles in each class in descending order.
- C. Side and top views of TssA<sub>VC</sub> reconstruction colored according to the local resolution variation, shown in the color bar in Angstroms.
- D. Angular distribution plot of TssA<sub>VC</sub> reconstruction (left), one dimensional tilt angle histogram of TssA<sub>VC</sub> final reconstruction.
- E. FSC curves from RELION postprocessing operation (left) calculated for the unmasked (green) and masked half-maps (blue), the masked half-maps corrected for the influence of the mask (black) and the random-phase corrected half-maps (red). Resolution (4 Å) is measured by the intersection of the FSC curves with the FSC = 0.143 line. Diagnostic output from 3DFSC processing server (right). Global FSC curve (red) and histogram of directional FSC (blue) are shown.
- F. Top and side views of Nt2-dimer of TssA<sub>VC</sub> reconstruction colored according to the local resolution variation, shown in the color bar in Angstroms.
- G. FSC curves from cryoSPARC v2 calculated for two unmasked half-maps (blue), after applying a soft spherical (green), soft (red) and tight (cyan) solvent masks, and after applying tight mask with correction by noise substitution (magenta).

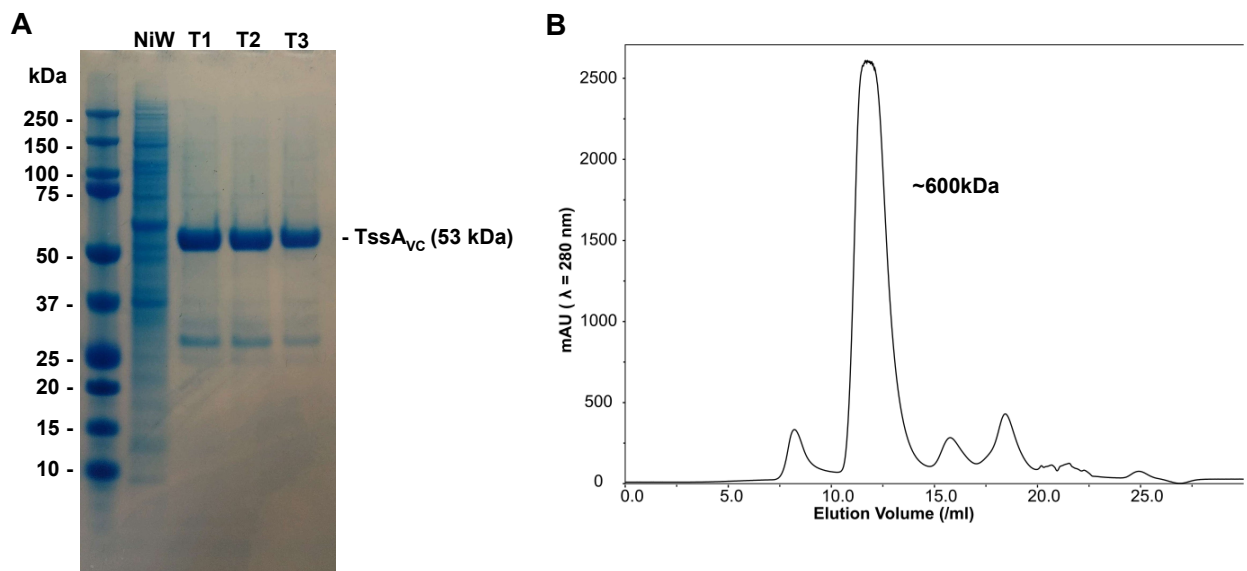

### Appendix Figure S3. TssA<sub>VC</sub> purification

A. Cropped SDS-PAGE of purified TssA<sub>VC</sub> prep, wash and elute fractions (T1-T3). Detected TssA<sub>VC</sub> monomer is shown on the right.

B. SEC profile of TssA<sub>VC</sub> with molecular weight estimation (600kDa).

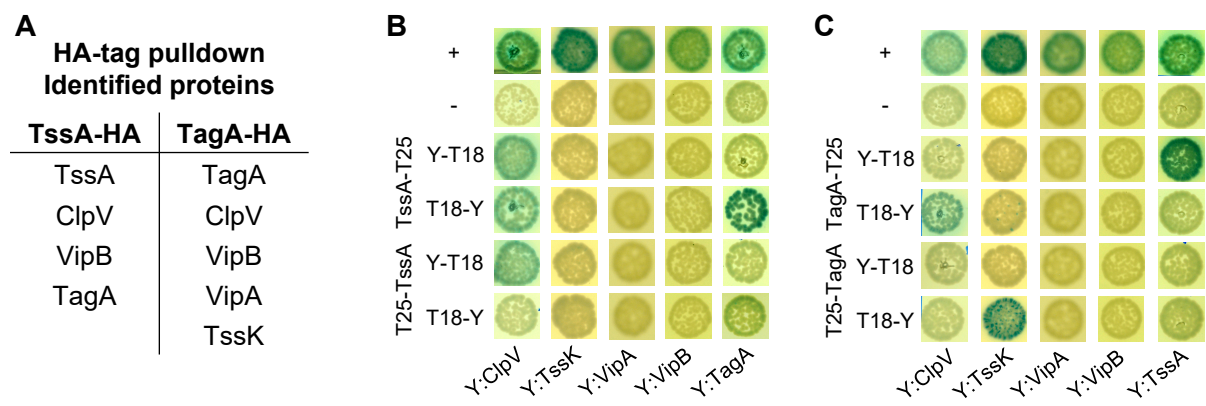

**Appendix Figure S4. TssA<sub>VC</sub> and TagA<sub>VC</sub> protein interaction assays**

- A. TssA<sub>VC</sub> and TagA<sub>VC</sub> interaction partners found in Co-IP using either TagA<sub>VC</sub>-HA or TagA<sub>VC</sub>-HA as bait.
- B. Bacterial two-hybrid assay to test interaction partners found via TssA<sub>VC</sub>-HA Co-IP. TssA<sub>VC</sub> - ClpV as well as TssA<sub>VC</sub> - TagA<sub>VC</sub> tests were positive.
- C. Bacterial two-hybrid assay to test interaction partners found via TagA<sub>VC</sub>-HA Co-IP. TagA<sub>VC</sub> - TssK, TagA<sub>VC</sub> - ClpV and TagA<sub>VC</sub> - TssA<sub>VC</sub> tests were positive. pKT25-zip and pUT18C-zip served as positive control (+), empty vectors pKT25 and pUT18C as negative control (-).

Appendix Table S1

|                     | TssA proteins % pairwise identity ( % pairwise similarity) |                    |                     |                    |                    |
|---------------------|------------------------------------------------------------|--------------------|---------------------|--------------------|--------------------|
|                     | TssA <sub>EC</sub>                                         | TssA <sub>AH</sub> | TssA2 <sub>PA</sub> | TssA <sub>BC</sub> | TagA <sub>EC</sub> |
| TssA <sub>VC</sub>  | 19,9% (33,5%)                                              | 32,8% (52,4%)      | 21,8% (41%)         | -                  | -                  |
| TssA <sub>EC</sub>  | -                                                          | 23,9% (36,2%)      | 25,2% (39,2%)       | -                  | -                  |
| TssA1 <sub>PA</sub> | -                                                          | -                  | -                   | 27,2% (40,2%)      | -                  |
| TagA <sub>VC</sub>  | -                                                          | -                  | -                   | -                  | 19,3% (32,7%)      |

Pairwise sequence alignment was performed using EMBOSS NEEDLE tool  
([https://www.ebi.ac.uk/Tools/psa/emboss\\_needle/](https://www.ebi.ac.uk/Tools/psa/emboss_needle/))

Appendix Table S1: Strains used in this study

| Organism                      | Genotype                                                                                                                  | Plasmid                        | Relevant features                                                                                                  | Source              |
|-------------------------------|---------------------------------------------------------------------------------------------------------------------------|--------------------------------|--------------------------------------------------------------------------------------------------------------------|---------------------|
| <i>V. cholerae</i><br>2740-80 | <i>lacZ</i> <sup>-</sup> , <i>Str</i> <sup>r</sup> , <i>vipA-mCherry2</i>                                                 |                                | C-terminal chromosomal fusion of <i>mCherry2</i> to <i>vipA</i>                                                    | this study          |
|                               | <i>lacZ</i> <sup>-</sup> , <i>Str</i> <sup>r</sup> , $\Delta$ <i>tssA</i> , <i>vipA-mCherry2</i>                          |                                | <i>tssA</i> deletion in <i>vipA-mCherry2</i> background                                                            | this study          |
|                               | <i>lacZ</i> <sup>-</sup> , <i>Str</i> <sup>r</sup> , $\Delta$ <i>tagA</i> , <i>vipA-mCherry2</i>                          |                                | <i>tagA</i> deletion in <i>vipA-mCherry2</i> background                                                            | this study          |
|                               | <i>lacZ</i> <sup>-</sup> , <i>Str</i> <sup>r</sup> , $\Delta$ <i>tssA</i> $\Delta$ <i>tagA</i> , <i>vipA-mCherry2</i>     |                                | <i>tssA tagA</i> double deletion in <i>vipA-mCherry2</i> background                                                | this study          |
|                               | <i>lacZ</i> <sup>-</sup> , <i>Str</i> <sup>r</sup> , $\Delta$ <i>vipA</i>                                                 |                                | <i>vipA</i> deletion in wild type background                                                                       | Basler et al., 2012 |
|                               | <i>lacZ</i> <sup>-</sup> , <i>Str</i> <sup>r</sup> , $\Delta$ <i>tssE</i>                                                 |                                | <i>tssE</i> deletion in wild type background                                                                       | Basler et al., 2012 |
|                               | <i>lacZ</i> <sup>-</sup> , <i>Str</i> <sup>r</sup> , $\Delta$ <i>tssE</i> $\Delta$ <i>tagA</i> , <i>vipA-mCherry2</i>     |                                | <i>tssE tagA</i> double deletion in <i>vipA-mCherry2</i> background                                                | this study          |
|                               | <i>lacZ</i> <sup>-</sup> , <i>Str</i> <sup>r</sup> , $\Delta$ <i>tssA</i> , <i>vipA-mCherry2</i>                          | pBAD24- <i>tssA</i>            | Complementation of <i>tssA</i> deletion in <i>vipA-mCherry2</i> background from inducible vector; Amp <sup>r</sup> | this study          |
|                               | <i>lacZ</i> <sup>-</sup> , <i>Str</i> <sup>r</sup> , $\Delta$ <i>tagA</i> , <i>vipA-mCherry2</i>                          | pBAD24- <i>tagA</i>            | Complementation of <i>tagA</i> deletion in <i>vipA-mCherry2</i> background from inducible vector; Amp <sup>r</sup> | this study          |
|                               | <i>lacZ</i> <sup>-</sup> , <i>Str</i> <sup>r</sup> , $\Delta$ <i>tssA</i> , <i>vipA-mCherry2</i>                          | pBAD24- <i>tssA-mNeonGreen</i> | Complementation of <i>tssA</i> deletion in <i>vipA-mCherry2</i> background from inducible vector; Amp <sup>r</sup> | this study          |
|                               | <i>lacZ</i> <sup>-</sup> , <i>Str</i> <sup>r</sup> , $\Delta$ <i>tagA</i> , <i>vipA-mCherry2</i>                          | pBAD24- <i>tagA-mNeonGreen</i> | Complementation of <i>tagA</i> deletion in <i>vipA-mCherry2</i> background from inducible vector; Amp <sup>r</sup> | this study          |
|                               | <i>lacZ</i> <sup>-</sup> , <i>Str</i> <sup>r</sup> , <i>vipA-mCherry2</i> , <i>tssA-mNeonGreen</i>                        |                                | C-terminal chromosomal fusion of <i>mNeonGreen</i> to <i>tssA</i>                                                  | this study          |
|                               | <i>lacZ</i> <sup>-</sup> , <i>Str</i> <sup>r</sup> , <i>vipA-mCherry2</i> , <i>tagA-mNeonGreen</i>                        |                                | C-terminal chromosomal fusion of <i>mNeonGreen</i> to <i>tagA</i>                                                  | this study          |
|                               | <i>lacZ</i> <sup>-</sup> , <i>Str</i> <sup>r</sup> , $\Delta$ <i>tagA</i> , <i>vipA-mCherry2</i> , <i>tssA-mNeonGreen</i> |                                | <i>tagA</i> deletion in <i>vipA-mCherry2 tssA-mNeonGreen</i> background                                            | this study          |
|                               | <i>lacZ</i> <sup>-</sup> , <i>Str</i> <sup>r</sup> , <i>vipA-mCherry2</i> , <i>tssA-mNeonGreen</i>                        | pBAD24- <i>tagA</i>            | Overproduction of TagA in VipA-mCherry2 TssA-mNeonGreen background, Amp <sup>r</sup>                               | this study          |
|                               | <i>lacZ</i> <sup>-</sup> , <i>Str</i> <sup>r</sup> , $\Delta$ <i>tssA</i> , <i>vipA-mCherry2</i>                          | pBAD24- <i>tssA-HA</i>         | Co-IP, Amp <sup>r</sup>                                                                                            | this study          |
|                               | <i>lacZ</i> <sup>-</sup> , <i>Str</i> <sup>r</sup> , $\Delta$ <i>tagA</i> , <i>vipA-mCherry2</i>                          | pBAD24- <i>tagA-HA</i>         | Co-IP, Amp <sup>r</sup>                                                                                            | this study          |
|                               | <i>lacZ</i> <sup>-</sup> , <i>Str</i> <sup>r</sup> , <i>lacZ::3xlacO</i>                                                  |                                | 3x <i>lacO</i> array integrated into <i>lacZ</i> gene                                                              | this study          |

Appendix Table S2

| Organism                     | Genotype                                                                                                            | Plasmid                        | Relevant features                                                                                                        | Source     |
|------------------------------|---------------------------------------------------------------------------------------------------------------------|--------------------------------|--------------------------------------------------------------------------------------------------------------------------|------------|
|                              | <i>lacZ<sup>-</sup>, Str<sup>r</sup>, lacZ::6x<i>lacO</i></i>                                                       |                                | 6x <i>lacO</i> array integrated into <i>lacZ</i> gene                                                                    | this study |
|                              | <i>lacZ<sup>-</sup>, Str<sup>r</sup>, lacZ::12x<i>lacO</i></i>                                                      |                                | 6x <i>lacO</i> array integrated into <i>lacZ</i> gene                                                                    | this study |
|                              | <i>lacZ<sup>-</sup>, Str<sup>r</sup>, lacZ::3x<i>lacO</i></i>                                                       | pBAD24 <i>lacI-mNeonGreen</i>  | Fluorescence quantification, generation of mNeonGreen spot with 6 molecules                                              | this study |
|                              | <i>lacZ<sup>-</sup>, Str<sup>r</sup>, lacZ::6x<i>lacO</i></i>                                                       | pBAD24 <i>lacI-mNeonGreen</i>  | Fluorescence quantification, generation of mNeonGreen spot with 12 molecules                                             | this study |
|                              | <i>lacZ<sup>-</sup>, Str<sup>r</sup>, lacZ::12x<i>lacO</i></i>                                                      | pBAD24 <i>lacI-mNeonGreen</i>  | Fluorescence quantification, generation of mNeonGreen spot with 24 molecules                                             | this study |
|                              | <i>lacZ<sup>-</sup>, Str<sup>r</sup>, Δ<i>vgrG1</i>, Δ<i>vasX</i>, <i>vipA-mCherry2</i>, <i>tssA-mNeonGreen</i></i> |                                | Δ <i>vgrG1</i> , Δ <i>vasX</i> deletion in double labeled strain used for photobleaching experiments                     | this study |
| <i>P. aeruginosa</i><br>PAO1 | <i>Irg<sup>r</sup>, Δ<i>retS</i>, TssB1-mCherry2</i>                                                                |                                | C-terminal chromosomal fusion of <i>mCherry2</i> to <i>tssB1</i>                                                         | this study |
|                              | <i>Irg<sup>r</sup>, Δ<i>retS</i>, Δ<i>tssA1</i>, TssB1-mCherry2</i>                                                 |                                | <i>tssA1</i> deletion in <i>tssb1-mCherry2</i> background                                                                | this study |
|                              | <i>Irg<sup>r</sup>, Δ<i>retS</i>, Δ<i>tssA1</i>, TssB1-mCherry2</i>                                                 | pPSV35 <i>tssA1</i>            | Complementation of <i>tssA1</i> mutant from IPTG inducible vector, Gent <sup>R</sup>                                     | this study |
|                              | <i>Irg<sup>r</sup>, Δ<i>retS</i>, Δ<i>tssA1</i>, TssB1-mCherry2</i>                                                 | pPSV35 <i>tssA1-mNeonGreen</i> | Complementation of <i>tssA1</i> mutant with <i>tssA1-mNeonGreen</i> fusion from IPTG inducible vector, Gent <sup>R</sup> | this study |
|                              | <i>Irg<sup>r</sup>, Δ<i>retS</i>, TssB1-mCherry2</i>                                                                | pPSV35 <i>tssA1-mNeonGreen</i> | Ectopic expression of <i>tssA1-mNeonGreen</i> fusion from IPTG inducible vector, Gent <sup>R</sup>                       | this study |
|                              | <i>Irg<sup>r</sup>, Δ<i>retS</i>, TssB2-mCherry2</i>                                                                |                                | C-terminal chromosomal fusion of <i>mCherry2</i> to <i>tssB2</i>                                                         | this study |
|                              | <i>Irg<sup>r</sup>, Δ<i>retS</i>, Δ<i>tssA2</i>, TssB2-mCherry2</i>                                                 |                                | <i>tssA2</i> deletion in <i>tssb2-mCherry2</i> background                                                                | this study |
|                              | <i>Irg<sup>r</sup>, Δ<i>retS</i>, TssB2-mCherry2, TssA2-mNeonGreen</i>                                              |                                | C-terminal chromosomal fusion of <i>mNeonGreen</i> to <i>tssA2</i> in <i>tssB-mCherry2</i> background                    | this study |
| <i>E. coli</i><br>SM10 λ pir | Km <sup>r</sup> , thi-1, thr, leu, tonA, lacY, supE, recA::RP4-2-Tc::Mu, pir                                        | pWM91                          | Allelic replacement vector used for all in-frame deletions by conjugation; <i>sacB</i> , Amp <sup>r</sup>                |            |
| SM10 λ pir                   | Km <sup>r</sup> , thi-1, thr, leu, tonA, lacY, supE, recA::RP4-2-Tc::Mu, pir                                        | pEXG2                          | Allelic replacement vector used for all in-frame deletions by conjugation; <i>sacB</i> , Gent <sup>r</sup>               |            |

Appendix Table S2

| Organism   | Genotype                                                                                                                                                                                      | Plasmid | Relevant features           | Source |
|------------|-----------------------------------------------------------------------------------------------------------------------------------------------------------------------------------------------|---------|-----------------------------|--------|
| DH5α λ pir | F <sup>-</sup> , endA1, glnV44, thi-1, recA1, relA1, gyrA96 deoR, nupG, Φ80d/ <i>lacZ</i> ΔM15, ( <i>lacZ</i> YA- <i>argF</i> )U169, hsdR17(rK <sup>-</sup> mK <sup>+</sup> ), λ <sup>-</sup> |         | Cloning strain              |        |
| MG1655     | F <sup>-</sup> , lambda <sup>-</sup> , rph-1                                                                                                                                                  |         | Bacterial competition assay |        |
| MG1655     | F <sup>-</sup> , lambda <sup>-</sup> , rph-1                                                                                                                                                  | pBAD24  | Bacterial competition assay |        |

**Appendix Table S3.** Summary of Co-IP and subsequent MS analysis. (Semi-)quantitative comparison of pulldown experiments with HA-tagged versions of TssA or TagA and WT control. QV—Quantitative value (normalized total spectra), US—exclusive unique spectra (threshold was set to 5). Percent coverage (percentage of all the amino acids in the protein sequence that were covered by identified peptides detected in the sample) threshold was set to 10%.

|                     | WT             |                |                | TssA-HA        |                |                | TagA-HA        |                |                |
|---------------------|----------------|----------------|----------------|----------------|----------------|----------------|----------------|----------------|----------------|
| Identified Proteins | E1<br>QV (US)* | E2<br>QV (US)* | E3<br>QV (US)* | E1<br>QV (US)* | E2<br>QV (US)* | E3<br>QV (US)* | E1<br>QV (US)* | E2<br>QV (US)* | E3<br>QV (US)* |
| <b>TssA</b>         | -              | -              | -              | 72 (30)        | 63 (38)        | 73 (22)        | -              | -              | -              |
| <b>TagA</b>         | -              | -              | -              | -              | 3 (5)          | 8 (5)          | 50 (28)        | 15 (19)        | 8 (16)         |
| <b>ClpV</b>         | -              | 13 (7)         | -              | 13 (14)        | 21 (22)        | 24 (8)         | 20 (24)        | 24 (33)        | 23 (44)        |
| <b>VipB</b>         | -              | 9 (7)          | -              | 7 (6)          | 8 (8)          | -              | 8 (9)          | 7 (9)          | 7 (13)         |
| <b>VipA</b>         | -              | -              | -              | 6 (6)          | -              | -              | 6 (7)          | 4 (6)          | 3 (6)          |
| <b>TssK</b>         | -              | -              | -              | -              | -              | -              | 5 (6)          | 7 (9)          | 5 (10)         |

E1 – E3 = Experiment 1-3. One experiment contains the average of two to four technical replicates.

\*QV = (Average of the spectrum counts for all of the samples) \* (Spectrum counts in each sample) / (Individual sample's sum)

\*US = Number of unique spectra attributed to a single protein.

Appendix Table S4

| Data collection and processing                      |                     |              |
|-----------------------------------------------------|---------------------|--------------|
| Magnification                                       | 130kx               |              |
| Voltage (kV)                                        | 300                 |              |
| Frames (no.)                                        | 40                  |              |
| Electron exposure (e <sup>-</sup> Å <sup>-2</sup> ) | 60                  |              |
| Defocus range (μm)                                  | [-1:-3.5]           |              |
| Pixel size (Å)                                      | 1.058               |              |
| Symmetry imposed                                    | C6                  |              |
| Movies (no.)                                        | 2963                |              |
| Initial particle images (no.)                       | 261412              |              |
| Final particle images (no.)                         | 31781               |              |
| Map resolution (Å)                                  | 3.9                 |              |
| FSC threshold                                       | 0.143               |              |
|                                                     |                     |              |
|                                                     | Model               |              |
| <b>Composition</b>                                  |                     |              |
| Chains                                              | 2                   |              |
| Non-hydrogen atoms                                  | 2888                |              |
| Protein residues                                    | 182                 |              |
| Water                                               | 0                   |              |
| Ligands                                             | 0                   |              |
| <b>Bonds (RMSD)</b>                                 |                     |              |
| Length (Å) (# > 4σ)                                 | 0.006 (0)           |              |
| Angles (°) (# > 4σ)                                 | 1.324 (6)           |              |
| <b>MolProbity score</b>                             | 1.78                |              |
| <b>Clash score</b>                                  | 5.19                |              |
| <b>Ramachandran plot (%)</b>                        |                     |              |
| Outliers                                            | 0                   |              |
| Allowed                                             | 8.43                |              |
| Favored                                             | 91.57               |              |
| <b>Rotamer outliers (%)</b>                         | 0                   |              |
| <b>Cβ outliers (%)</b>                              | 0                   |              |
| <b>Peptide plane (%)</b>                            |                     |              |
| Cis proline/general                                 | 0.0/0.0             |              |
| Twisted proline/general                             | 0.0/0.0             |              |
| <b>CaBLAM outliers (%)</b>                          | 3.45                |              |
| <b>ADP (B-factors)</b>                              |                     |              |
| Iso/Aniso (#)                                       | 1454/0              |              |
| min/max/mean                                        |                     |              |
| Protein                                             | 91.97/163.67/119.96 |              |
| Nucleotide                                          | ---                 |              |
| Ligand                                              | ---                 |              |
| Water                                               | ---                 |              |
| <b>Occupancy</b>                                    |                     |              |
| Mean                                                | 1                   |              |
| occ = 1 (%)                                         | 100                 |              |
| 0 < occ < 1 (%)                                     | 0                   |              |
| occ > 1 (%)                                         | 0                   |              |
|                                                     |                     |              |
|                                                     | Data                |              |
| <b>Box</b>                                          |                     |              |
| Lengths (Å)                                         | 69.83, 47.61, 49.73 |              |
| Angles (°)                                          | 90.00, 90.00, 90.00 |              |
| <b>Supplied Resolution (Å)</b>                      | 3.9                 |              |
| <b>Resolution Estimates (Å)</b>                     | Masked              | Unmasked     |
| d FSC (half maps; 0.143)                            | 3.6                 | 2            |
| d 99 (full/half1/half2)                             | 4.1/6.8/7.0         | 3.9/5.2/5.2  |
| d model                                             | 3.9                 | 3.9          |
| d FSC model (0/0.143/0.5)                           | 3.4/3.7/7.2         | 3.4/3.8/13.9 |
| <b>Map min/max/mean</b>                             | -19.10/37.15/-0.00  |              |
|                                                     |                     |              |
|                                                     | Model vs. Data      |              |
| CC (mask)                                           | 0.68                |              |
| CC (box)                                            | 0.52                |              |
| CC (peaks)                                          | 0.23                |              |
| CC (volume)                                         | 0.68                |              |
| Mean CC for ligands                                 | ---                 |              |
